# Supplementary material for: Physical adsorption of OH− causes anomalous charging at oxide–water interfaces
Source: Royal Society of Chemistry journal article supplement (doi:10.1039/d4cc01833h), 2024-01-01
Supplement: d4cc01833h1.pdf [file d4cc01833h1.pdf]

|    |                                                                                                                       |
|----|-----------------------------------------------------------------------------------------------------------------------|
| 27 | This document includes the following contents:                                                                        |
| 28 | <b>S1 Methodology</b>                                                                                                 |
| 29 | <b>S1.1 Models</b>                                                                                                    |
| 30 | <b>S1.2 <i>ab initio</i> molecular dynamics (AIMD)</b>                                                                |
| 31 | <b>S1.3 Calculation of pK<sub>a</sub> values</b>                                                                      |
| 32 | <b>S1.4 Calculation of Reorientation time</b>                                                                         |
| 33 | <b>S2 Results</b>                                                                                                     |
| 34 | <b>S2.1 pK<sub>a</sub>s</b>                                                                                           |
| 35 | <b>S2.2 Reorientation time</b>                                                                                        |
| 36 | <b>S2.3 Additional trajectories for OH<sup>-</sup> adsorption on corundum (0001)-water interface</b>                  |
| 37 | <b>S2.4 OH<sup>-</sup> adsorption on gibbsite (001)-water and Ga<sub>2</sub>O<sub>3</sub> (0001)-water interfaces</b> |
| 38 |                                                                                                                       |
| 39 |                                                                                                                       |

40 **S1 Methodology**

41

42 **S1.1 Models**

43 The crystal structure data reported in Ref. 1 were used to build the surface model:  $a=b=4.757$   
44 Å,  $c=12.9877$  Å and  $\alpha=\beta=90^\circ$ ,  $\gamma=120^\circ$ . The (0001) surface model (Fig. S1) consisted of  $2\times 2\times 1$   
45 unit cells and was cut from the bulk crystal based on the structure derived by CTR and X-ray  
46 reflectivity (XR) studies,<sup>2,3</sup> where the O atoms on the surfaces were all protonated and every OH  
47 group bridged two subsurface Al atoms (i.e.  $\text{Al}_2\text{OH}$ ).

48 The surface model was placed in a 3D periodically repeated cell of  $9.514\times 9.514\times 30.000$  Å<sup>3</sup>.  
49 The cell had a solution region of  $\sim 16$  Å in the direction perpendicular to the surface. 42 water  
50 molecules were placed in the solution region, which approximately reproduces the density of bulk  
51 water under ambient conditions. For the  $\text{OH}^-$  containing system, one  $\text{OH}^-$  was inserted into the  
52 solution at an initial position of 5.5 Å from the plane of surface O atoms.

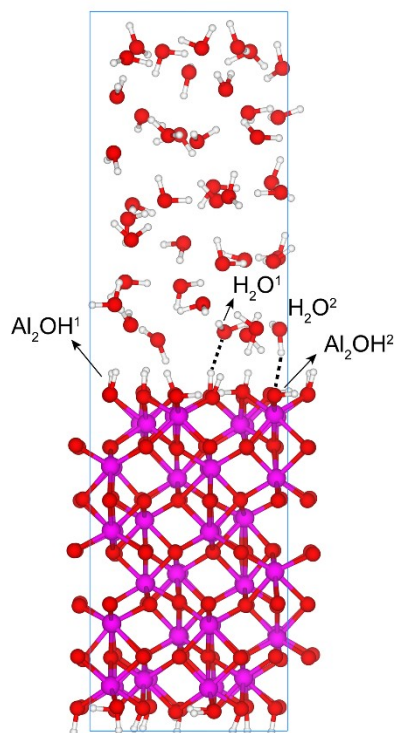

53

54 **Fig. S1. The corundum (0001) surface model used in the present study.**  $\text{Al}_2\text{OH}^1$  and  $\text{Al}_2\text{OH}^2$   
55 mark the two differently oriented surface groups. Two kinds of water molecules that hydrogen  
56 bonded with surface groups (i.e.  $\text{H}_2\text{O}^1$  and  $\text{H}_2\text{O}^2$ ) are also indicated. O = red, H = white, Al =  
57 purple.

58 Adsorption of OH<sup>-</sup> on another two OH covered surface, i.e., gibbsite (001)-water and Ga<sub>2</sub>O<sub>3</sub>  
59 (0001)-water interfaces was also investigated. These two surfaces have similar surface structures  
60 to corundum (0001) surface. The crystal structure parameters used for building the gibbsite (001)  
61 surface model were  $a = 8.742 \text{ \AA}$ ,  $b = 5.112 \text{ \AA}$ ,  $c = 9.801 \text{ \AA}$  and  $\alpha = \gamma = 90^\circ$ ,  $\beta = 94.54^\circ$ .<sup>4</sup> The cell  
62 parameters used for building Ga<sub>2</sub>O<sub>3</sub> (0001) surface were  $a = b = 4.997 \text{ \AA}$ ,  $c = 13.451 \text{ \AA}$  and  $\alpha = \beta$   
63  $= 90^\circ$ ,  $\gamma = 120^\circ$ . The gibbsite (001) surface model contained  $1 \times 2 \times 1$  unit cells and the Ga<sub>2</sub>O<sub>3</sub>  
64 (0001) surface model contained  $2 \times 2 \times 1$  unit cells. Both surface models were surmounted by a  
65  $\sim 16 \text{ \AA}$  thick solution region that contained 48 and 46 water molecules for gibbsite (001) and Ga<sub>2</sub>O<sub>3</sub>  
66 (0001) surface models respectively. The simulation box had the dimensions of  $8.742 \times 10.224 \times$   
67  $25.770 \text{ \AA}^3$  for gibbsite (001) surface (Fig. S2A) and  $9.995 \times 9.995 \times 31.0 \text{ \AA}^3$  for Ga<sub>2</sub>O<sub>3</sub> (0001)  
68 surface (Fig. S2B).

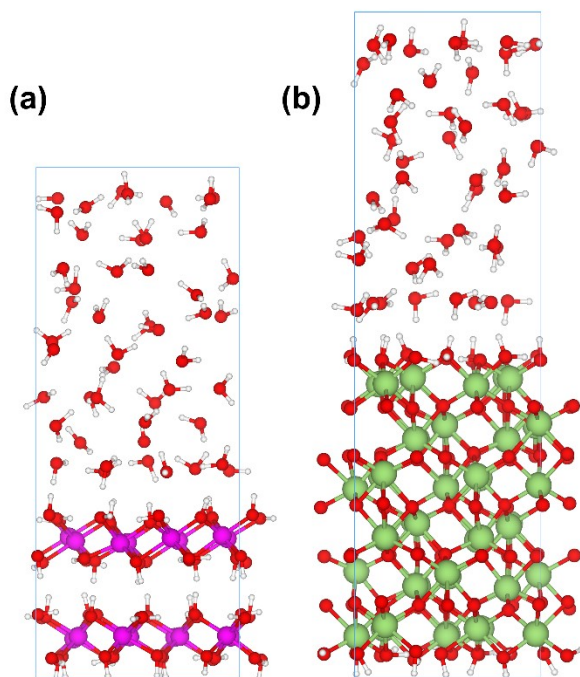

69

70 **Fig. S2.** The gibbsite (001) surface model (A) and Ga<sub>2</sub>O<sub>3</sub> (0001) surface model (B) used in the  
71 present study. O = red, H = white, Al = purple, Ga = green.

## 73 **S1.2 *ab initio* molecular dynamics (AIMD)**

74 The CP2K/QUICKSTEP package<sup>5,6</sup> was applied to carry out the AIMD simulations. With  
75 this code, the electronic structures were calculated with density functional theory implemented  
76 with a hybrid Gaussian plane wave (GPW) approach<sup>7</sup>. PBE functional<sup>8</sup> and Goedecker-Teter-  
77 Hutter pseudopotentials<sup>9</sup> were used. van der Waals corrections were included with the DFT-D3  
78 method.<sup>10</sup> The plane wave basis cutoff for the electron density was set to 360 Ry. For the charged  
79 systems, the net charges were neutralized by adding a background charge as implemented in the  
80 CP2K/QUICKSTEP code.

81 Born-Oppenheimer type molecular dynamics simulations were carried out with a wave  
82 function optimization tolerance of  $1.0 \times 10^{-6}$ .<sup>11</sup> The MD timestep was 0.5 fs. The temperature was  
83 controlled at 330K by using the Nose-Hoover chain thermostat. This higher temperature was to  
84 avoid the glassy behavior of liquid water at lower temperature.<sup>12</sup> A free AIMD simulation was  
85 performed for  $\sim 45$  ps to probe the reorientational dynamics of interfacial water. The reorientation  
86 time of bulk water was calculated from a  $\sim 60$  ps AIMD trajectory of system consisted of 64 water  
87 molecules. The simulation times were enough to investigate the reorientation dynamics of  
88 water.<sup>13,14</sup> Three OH<sup>-</sup>-bearing systems with different initial configurations were adopted to derive  
89 the position and dynamics of OH<sup>-</sup>. The AIMD simulations last  $\sim 35$  ps,  $\sim 50$  ps, and  $\sim 120$  ps for the  
90 three OH<sup>-</sup>-bearing systems respectively. For the pKa calculation, a production run was performed  
91 for over 10 ps following an equilibration run of at least 5 ps.

## 92 **S1.3 Calculation of pKa values**

93 The pKa calculation technique we applied was the half-reaction scheme of the vertical energy  
94 gap method.<sup>15,16</sup> With this scheme, the acidic proton was transformed into a dummy atom. A proton  
95 of a hydronium located in the solution region was transformed into a dummy in the same way. The  
96 free energy changes of these processes were obtained by using the thermodynamic integration  
97 relation. The pKa value was finally derived from these free energy changes. For details, we refer  
98 to previous publications.<sup>17-19</sup>

99 In the simulations, a restrained harmonic potential ( $V_r$ ) was applied to keep the dummy in a  
100 location resembling that of the acid proton in the reactant state,

101 
$$V_r = \sum_{bonds} \frac{1}{2} k_d (d - d_0)^2 + \sum_{angles} \frac{1}{2} k_\theta (\theta - \theta_0)^2 \quad \backslash * \text{MERGEFORMAT (1)}$$

102 The equilibrium values used for each surface group were derived from the simulations without  
 103 restraints and the force constants  $k_d$  and  $k_\theta$  were selected according to previous studies.<sup>15,16</sup> Table  
 104 S1 summarizes the parameters used in the simulations.

#### 105 S1.4 Calculation of Reorientation time

106 The reorientation time of water molecules was extracted from AIMD trajectory by calculating  
 107 the orientational time correlation function:

108 
$$C_2(t) = \langle P_2[\mathbf{u}(0) \cdot \mathbf{u}(t)] \rangle \quad \backslash * \text{MERGEFORMAT (2)}$$

109 where  $P_2$  is the second-order Legendre polynomial and  $\mathbf{u}$  is the unit vector of a water O-H bond.<sup>20</sup>  
 110 The reorientation time  $\tau_2$  was determined by fitting  $C_2(t)$  to the function  $B \exp(-t / \tau_2)$  (Fig. S3).

### 111 S2 Results

#### 112 S2.1 pKas

113 Table S2 lists the averaged vertical energy gaps, free energy changes, and pKa values for  
 114  $\text{Al}_2\text{OH}^1$  and  $\text{Al}_2\text{OH}^2\text{H}$  on corundum (0001) surface and two differently oriented water molecules  
 115 in the first-layer water.

116 **Table S1.** The parameters used in restraining the dummy atoms (harmonic potentials in Eq. (1)).  
 117  $\text{H}_d$  represents the dummy atom.  $n_d$  and  $n_\theta$  denote the number of restrained bonds and angles,  
 118 respectively.  $d_0$  stands for equilibrium bond lengths (in Bohr), and  $\theta_0$  stands for equilibrium angles  
 119 (in radian).

| Surface group                            | $n_d$ | $d_0$ | $k_d$ | $n_\theta$ | $\theta_0$                 | $k_\theta$ |
|------------------------------------------|-------|-------|-------|------------|----------------------------|------------|
| $\equiv\text{Al}_2\text{OH}_2\text{H}_d$ | 1     | 1.91  | 0.1   | 3          | 1.87 (H-O- $\text{H}_d$ )  | 0.1        |
|                                          |       |       |       |            | 2.00 (Al-O- $\text{H}_d$ ) | 0.1        |
|                                          |       |       |       |            | 2.00 (Al-O- $\text{H}_d$ ) | 0.1        |
| $\equiv\text{Al}_2\text{OH}^1d$          | 1     | 1.91  | 0.1   | 2          | 2.00 (Al-O- $\text{H}_d$ ) | 0.1        |
|                                          |       |       |       |            | 2.00 (Al-O- $\text{H}_d$ ) | 0.1        |
| $\text{HOH}^1d$                          | 2     | 1.89  | 1.0   | 1          | 1.87 (H-O- $\text{H}_d$ )  | 0.1        |
|                                          |       | 1.89  | 1.0   |            |                            |            |
| $\text{HOH}^2d$                          | 2     | 1.89  | 1.0   | 1          | 1.87 (H-O- $\text{H}_d$ )  | 0.1        |
|                                          |       | 1.89  | 1.0   |            |                            |            |
| $\text{H}_2\text{H}_d\text{O}^+$         | 3     | 1.89  | 1.0   | 2          | 1.94 (H-O- $\text{H}_d$ )  | 0.1        |

1.89      1.0                      1.94 (H-O-H<sub>d</sub>)                      0.1  
 1.89      1.0

---

120  
121

122 **Table S2.** The computed vertical energy gaps (in eV), thermodynamic integrals (in eV), and pKas.

123

| Surface group                     | $\eta=1.0$ | $\eta=0.75$ | $\eta=0.5$ | $\eta=0.25$ | $\eta=0.0$ | $\Delta A$ | pKa      |
|-----------------------------------|------------|-------------|------------|-------------|------------|------------|----------|
| Al <sub>2</sub> OH <sup>1</sup>   | 14.68±0.01 | 20.13±0.02  | 21.33±0.01 | 22.43±0.01  | 23.20±0.01 | 20.90±0.01 | 18.0±0.4 |
| Al <sub>2</sub> OH <sup>2</sup> H | 16.14±0.05 | 19.01±0.02  | 19.93±0.03 | 21.32±0.02  | 22.05±0.02 | 19.95±0.02 | 1.9±0.5  |
| H <sub>2</sub> O <sup>1</sup>     | 16.29±0.05 | 19.35±0.04  | 21.07±0.04 | 22.29±0.04  | 23.51±0.01 | 20.71±0.04 | 14.5±1.3 |
| H <sub>2</sub> O <sup>2</sup>     | 16.06±0.01 | 19.37±0.01  | 20.92±0.01 | 22.28±0.05  | 23.43±0.04 | 20.66±0.03 | 13.7±1.2 |
| H <sub>3</sub> O <sup>+</sup>     | 15.36±0.01 | 18.41±0.04  | 19.74±0.04 | 21.23±0.04  | 22.47±0.01 | 19.65±0.04 | □        |

124

## 125 S2.2 Reorientation time

126        The calculated reorientation times for water in different layers and for bulk water were  
 127 collected in Table S3. The time correlation functions and fitting curves for the first layer water and  
 128 bulk water were shown in Fig. S3 as examples. It can be seen that the fitting functions can describe  
 129 the correlation data very well. The reorientation time obtained for bulk water was slightly higher  
 130 than the experimental results (i.e. 1.95~3.0 ps from NMR and fsIR measurements),<sup>21-23</sup> which is  
 131 characteristic for DFT simulations. Nevertheless, the reorientation time obtained for bulk water  
 132 was almost identical (i.e. 5.5 V.S. 5.7) to the value reported in Ref. <sup>14</sup> using the same settings,  
 133 which validates our calculations. The reorientation time of interfacial water decreased as the  
 134 distance from corundum (0001) surface increased. The reorientation of the first-layer water was  
 135 three times slower than the bulk water while the third-layer water was already bulk-like.

136

137 **Table S3.** The calculated reorientation time for water.

| Location of water | Reorientation time (ps) |
|-------------------|-------------------------|
| 1st layer         | 18.6                    |
| 2nd layer         | 7.8                     |
| 3rd layer         | 6.6                     |
| bulk              | 5.5                     |

138  
139  
140

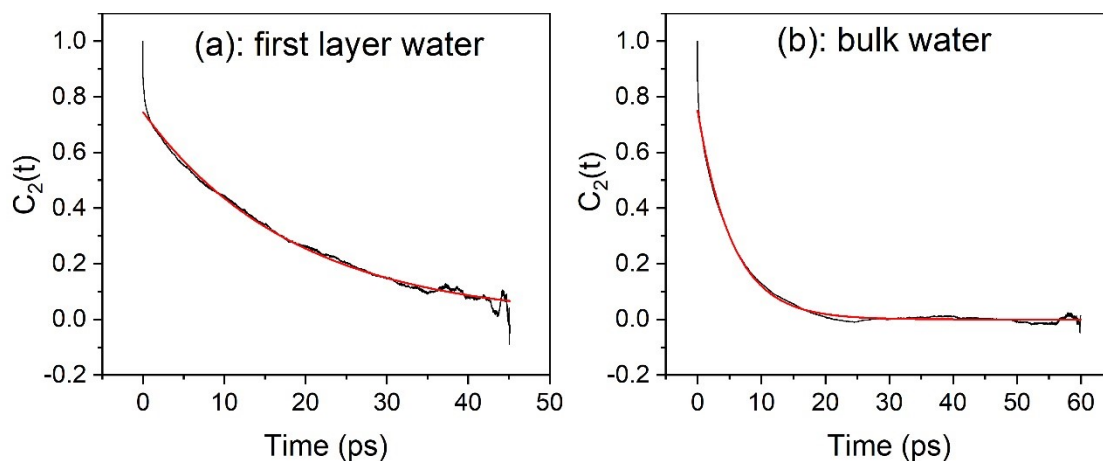

141

142 **Fig. S3. The orientational time correlation functions and fitting curves. (A)** the first layer water  
 143 and **(B)** bulk water.

144

145

### 146 **S2.3 Additional trajectories for OH<sup>-</sup> adsorption on corundum (0001)-water interface**

147 Adsorption of OH<sup>-</sup> observed in the present study is independent of its initial positions. To  
 148 support this conclusion, two additional AIMD simulations on corundum (0001)-water interface  
 149 were performed. The evolution of the height of OH<sup>-</sup> ion is shown in Fig. S4.

150 In the first trajectory (Fig. S4A), the OH<sup>-</sup> ion was initially placed 6.5 Å from the surface. At  
 151 ~6.8 ps, the OH<sup>-</sup> ion transferred to the first water layer after three successive successful jumps.  
 152 OH<sup>-</sup> adjusted its positions during 6.8~19.8 ps and kept above the corundum (0001) surface for the  
 153 following ~14.0 ps. OH<sup>-</sup> jumped into the second water layer temporarily (~2.0 ps) and returned  
 154 above the mineral surface in the rest of the trajectory.

155 In the second trajectory (Fig. S4B), the OH<sup>-</sup> ion was initially placed 8.5 Å from the surface.  
 156 The OH<sup>-</sup> ion transferred to the second water layer within 1.0 ps and stayed there for ~14.0 ps. It  
 157 went up to the third water layer temporarily and jumped to the top of the first water layer at ~19.7  
 158 ps. OH<sup>-</sup> kept at this position for the following ~44.0 ps with occasional jumps to the mineral  
 159 surface. At ~63.7 ps, OH<sup>-</sup> transferred above the mineral surface and stayed for the following 48.0  
 160 ps. It then left the first water layer temporarily for ~5.0 ps and jumped back above the mineral  
 161 surface.

162 Based on these trajectories, it can be found that OH<sup>-</sup> ion shows staged diffusion in all of these  
 163 trajectories and its dynamics is independent of the initial conditions. These different trajectories  
 164 also indicate that the first water layer can indeed trap the OH<sup>-</sup> ion effectively.



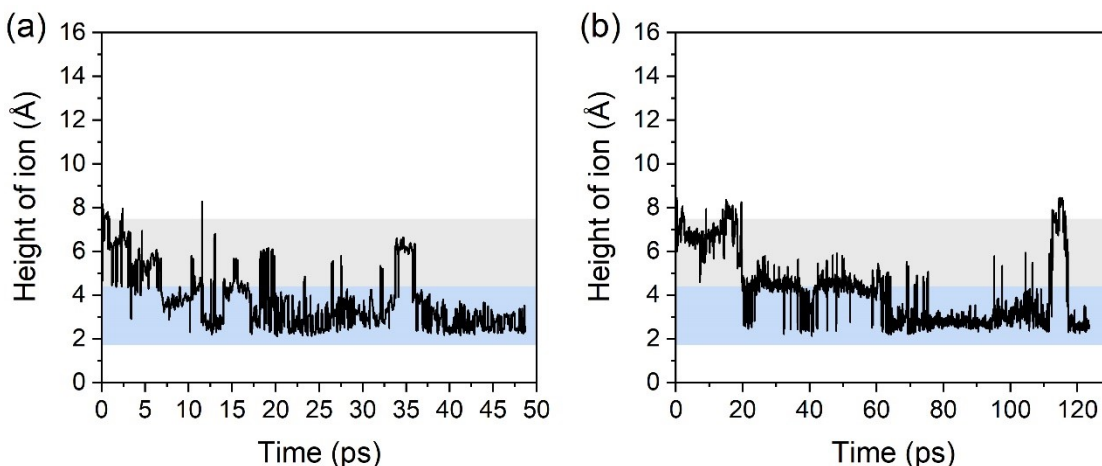

166

167 **Fig. S4. Height of OH<sup>-</sup> ion as a function of simulation time.** The plane of the outermost surface  
 168 O is taken as the origin of the y-axis. Initial positions of OH<sup>-</sup> ion were (A) 6.5 Å and (B) 8.5 Å  
 169 from the surface.

#### 170 S2.4 OH<sup>-</sup> adsorption on gibbsite (001)-water and Ga<sub>2</sub>O<sub>3</sub> (0001)-water interfaces

171 On gibbsite (001)-water interface, the OH<sup>-</sup> ion was initially placed ~6.5 Å from the surface  
 172 (Fig. S5A). The OH<sup>-</sup> ion stayed in the second layer for ~8.6 ps before it moved into the third water  
 173 layer. At ~18.7 ps, the OH<sup>-</sup> ion transferred from the third layer to the second water layer where it  
 174 stayed for less than 3 ps and diffused into the first water layer. OH<sup>-</sup> ion kept in the first layer for  
 175 the following 43 ps and both parallel and vertical orientations were observed for OH<sup>-</sup> in the first  
 176 water layer.

177 On Ga<sub>2</sub>O<sub>3</sub> (0001)-water interface, the OH<sup>-</sup> ion was initially placed 6.7 Å from the surface  
 178 (Fig. S5B). After two successful proton transfers, the OH<sup>-</sup> ion jumped into the first water layer  
 179 within less than 1 ps. It stayed on the interface for about 3 ps with occasional jumps to the bottom  
 180 of the second layer. At ~4.0 ps, the OH<sup>-</sup> moved to the bottom of the second layer and stayed there  
 181 for 4.3 ps. Then the OH<sup>-</sup> ion jumped back onto the surface and stayed in the first layer for the  
 182 following ~20 ps, during which there were several unsuccessful proton transfer attempts as  
 183 indicated by the spikes on the curve. On Ga<sub>2</sub>O<sub>3</sub> (0001)-water interface, the hydrogen bonding  
 184 environment of OH<sup>-</sup> was similar to that on corundum (0001) and both parallel and vertical  
 185 orientations were observed.

186 Based on these trajectories, it can be stated that apart from corundum-water interface, OH<sup>-</sup>  
187 ion can also be trapped on gibbsite-water and Ga<sub>2</sub>O<sub>3</sub>-water interfaces. These observations indicate  
188 that the proposed charging mechanism indeed applies for other OH covered surfaces.

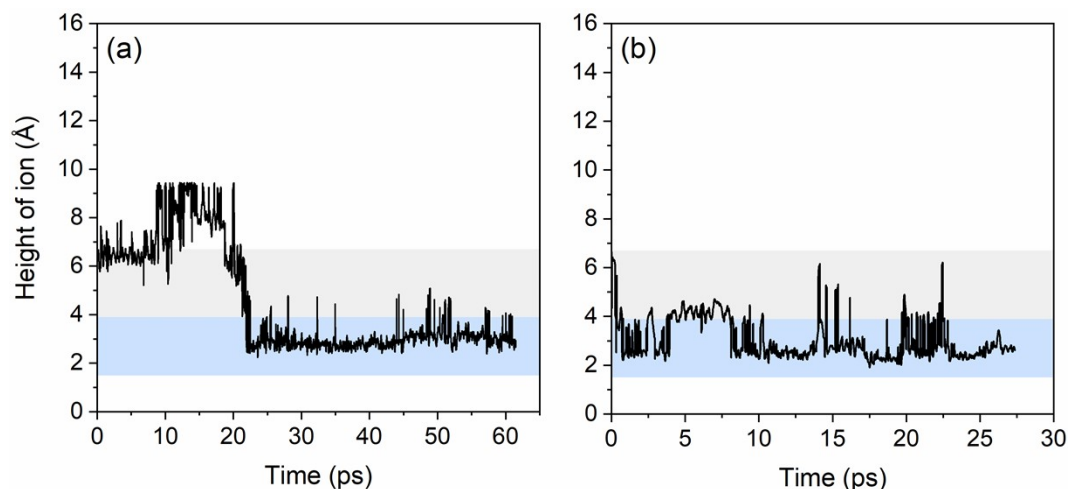

189

190 **Fig. S5.** Heights of OH<sup>-</sup> ion on (A) gibbsite (001)-water and (B) Ga<sub>2</sub>O<sub>3</sub> (0001)-water interfaces as  
191 a function of simulation time. The plane of the outermost surface O is taken as the origin of the y-  
192 axis.

193

194

195

196

197

## 198 References

- 199 1 A. Kirfel and K. Eichhorn, Accurate structure analysis with synchrotron radiation. The  
200 electron density in Al<sub>2</sub>O<sub>3</sub> and Cu<sub>2</sub>O, *Acta Crystallogr. Sect. A*, 1990, **46**, 271-284.
- 201 2 P. J. Eng, T. P. Trainor, G. E. Brown Jr, G. A. Waychunas, M. Newville, S. R. Sutton and  
202 M. L. Rivers, Structure of the Hydrated  $\alpha$ -Al<sub>2</sub>O<sub>3</sub> (0001) Surface, *Science*, 2000, **288**, 1029.
- 203 3 J. G. Catalano, Weak interfacial water ordering on isostructural hematite and corundum  
204 (001) surfaces, *Geochim. Cosmochim. Acta*, 2011, **75**, 2062-2071.
- 205 4 E. Balan, M. Lazzeri, G. Morin and F. Mauri, First-principles study of the OH-stretching  
206 modes of gibbsite, *Am. Mineral.*, 2006, **91**, 115-119.
- 207 5 J. VandeVondele, M. Krack, F. Mohamed, M. Parrinello, T. Chassaing and J. Hutter,  
208 Quickstep: Fast and accurate density functional calculations using a mixed Gaussian and  
209 plane waves approach, *Comput. Phys. Commun.*, 2005, **167**, 103-128.
- 210 6 J. Hutter, M. Iannuzzi, F. Schiffmann and J. VandeVondele, CP2K: atomistic simulations of  
211 condensed matter systems, *Wiley Interdiscip. Rev.-Comput. Mol. Sci.*, 2014, **4**, 15-25.
- 212 7 B. G. Lippert, J. Hutter and M. Parrinello, A hybrid Gaussian and plane wave density  
213 functional scheme, *Mol. Phys.*, 1997, **92**, 477-487.
- 214 8 J. P. Perdew, K. Burke and M. Ernzerhof, Generalized Gradient Approximation Made  
215 Simple, *Phys. Rev. Lett.*, 1997, **78**, 1396.
- 216 9 S. Goedecker, M. Teter and J. Hutter, Separable dual-space Gaussian pseudopotentials,  
217 *Phys. Rev. B*, 1996, **54**, 1703-1710.
- 218 10 S. Grimme, J. Antony, S. Ehrlich and H. Krieg, A consistent and accurate ab initio  
219 parametrization of density functional dispersion correction (DFT-D) for the 94 elements H-  
220 Pu, *J. Chem. Phys.*, 2010, **132**, 154104.
- 221 11 J. VandeVondele and J. Hutter, An efficient orbital transformation method for electronic  
222 structure calculations, *J. Chem. Phys.*, 2003, **118**, 4365-4369.
- 223 12 J. VandeVondele, F. Mohamed, M. Krack, J. Hutter, M. Sprik and M. Parrinello, The  
224 influence of temperature and density functional models in ab initio molecular dynamics  
225 simulation of liquid water, *J. Chem. Phys.*, 2005, **122**, 014515.
- 226 13 I. C. Lin, A. P. Seitsonen, I. Tavernelli and U. Rothlisberger, Structure and Dynamics of  
227 Liquid Water from ab Initio Molecular Dynamics—Comparison of BLYP, PBE, and  
228 revPBE Density Functionals with and without van der Waals Corrections, *J. Chem. Theory  
229 Comput.*, 2012, **8**, 3902-3910.
- 230 14 R. Réocreux, T. Jiang, M. Iannuzzi, C. Michel and P. Sautet, Structuration and Dynamics of  
231 Interfacial Liquid Water at Hydrated  $\gamma$ -Alumina Determined by ab Initio Molecular  
232 Simulations: Implications for Nanoparticle Stability, *ACS Appl. Nano Mater.*, 2018, **1**, 191-  
233 199.
- 234 15 M. Sulpizi and M. Sprik, Acidity constants from vertical energy gaps: density functional  
235 theory based molecular dynamics implementation, *Phys. Chem. Chem. Phys.*, 2008, **10**,  
236 5238-5249.
- 237 16 J. Cheng, M. Sulpizi and M. Sprik, Redox potentials and pK(a) for benzoquinone from  
238 density functional theory based molecular dynamics, *J. Chem. Phys.*, 2009, **131**, 154504.
- 239 17 F. Costanzo, M. Sulpizi, R. G. D. Valle and M. Sprik, The oxidation of tyrosine and  
240 tryptophan studied by a molecular dynamics normal hydrogen electrode, *J. Chem. Phys.*,  
241 2011, **134**, 244508.
- 242 18 J. Cheng and M. Sprik, Alignment of electronic energy levels at electrochemical interfaces,  
243 *Phys. Chem. Chem. Phys.*, 2012, **14**, 11245-11267.

- 244 19 X. Liu, J. Cheng, M. Sprik, X. Lu and R. Wang, Understanding surface acidity of gibbsite  
245 with first principles molecular dynamics simulations, *Geochim. Cosmochim. Acta*, 2013,  
246 **120**, 487-495.
- 247 20 D. Laage and J. T. Hynes, Reorientational dynamics of water molecules in anionic hydration  
248 shells, *Proc. Natl. Acad. Sci. U. S. A.*, 2007, **104**, 11167-11172.
- 249 21 R. Ludwig, NMR relaxation studies in water-alcohol mixtures: the water-rich region, *Chem.*  
250 *Phys.*, 1995, **195**, 329-337.
- 251 22 C. J. Fecko, J. J. Loparo, S. T. Roberts and A. Tokmakoff, Local hydrogen bonding  
252 dynamics and collective reorganization in water: Ultrafast infrared spectroscopy of  
253 HOD/D2O, *J. Chem. Phys.*, 2005, **122**, 054506.
- 254 23 Y. L. A. Rezus and H. J. Bakker, On the orientational relaxation of HDO in liquid water, *J.*  
255 *Chem. Phys.*, 2005, **123**, 114502.
- 256
